# Supplementary material for: Facile preparation of porous NiTiO3 nanorods with enhanced visible-light-driven photocatalytic performance
Source: Royal Society of Chemistry journal article supplement (doi:10.1039/c2jm32044d), 2012-01-01
Supplement: c2jm32044d.pdf [file c2jm32044d.pdf]

# Facile preparation of porous NiTiO<sub>3</sub> nanorods with enhanced visible-light-driven photocatalytic performance

Yang Qu,<sup>1,2</sup> Wei Zhou<sup>1</sup>, Zhiyu Ren,<sup>1</sup> Shichao Du,<sup>1</sup> Xiangying Meng<sup>1</sup>, Guohui Tian,<sup>1</sup> Kai Pan,<sup>1</sup>

Guofeng Wang,<sup>1</sup> and Honggang Fu<sup>1,2\*</sup>

1 Key Laboratory of Functional Inorganic Material Chemistry, Ministry of Education of the People's Republic of China, Heilongjiang University, Harbin 150080 P. R. China

2 State Key Laboratory of Theoretical and Computational Chemistry, Institute of Theoretical Chemistry, Jilin University, Changchun 130023, P. R. China

Corresponding author E-mail: [fuhg@vip.sina.com](mailto:fuhg@vip.sina.com), Tel.: +86 451 8660 4330, Fax: +86 451 8667

3647

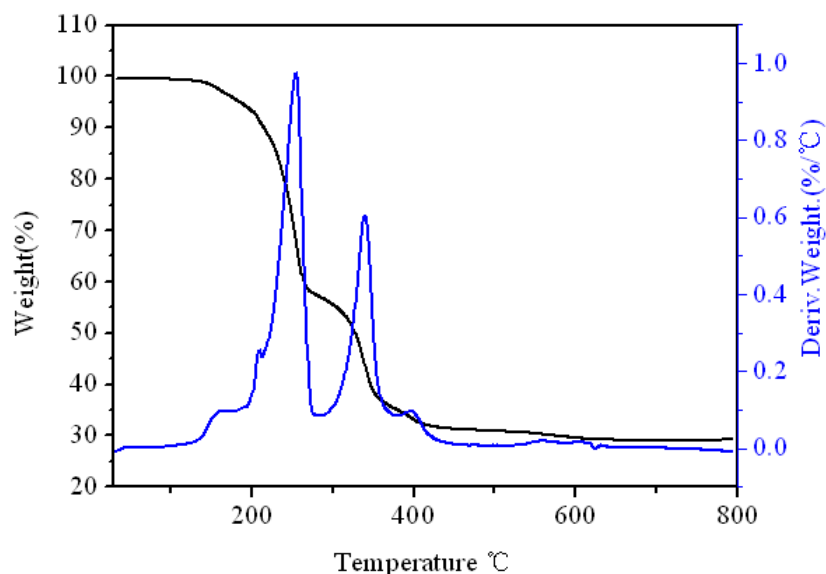

Figure S1. TG curve of the as-prepared NiTiO<sub>3</sub> nanorod.

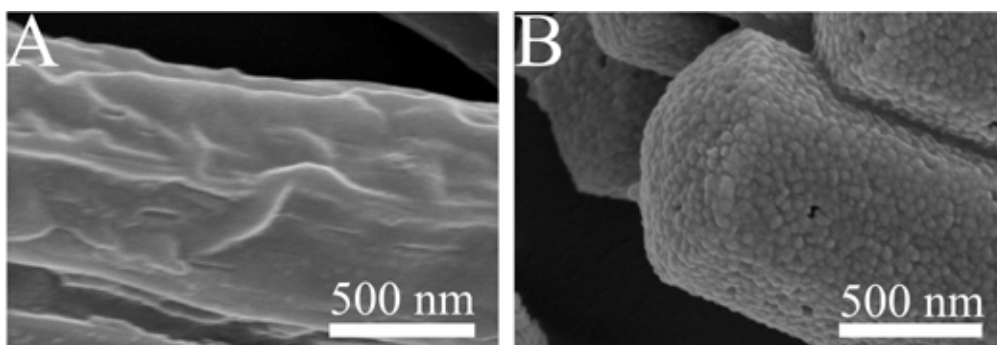

Figure S2. SEM images of the surface of the obtained NiTiO<sub>3</sub> nanorod before and after calcination

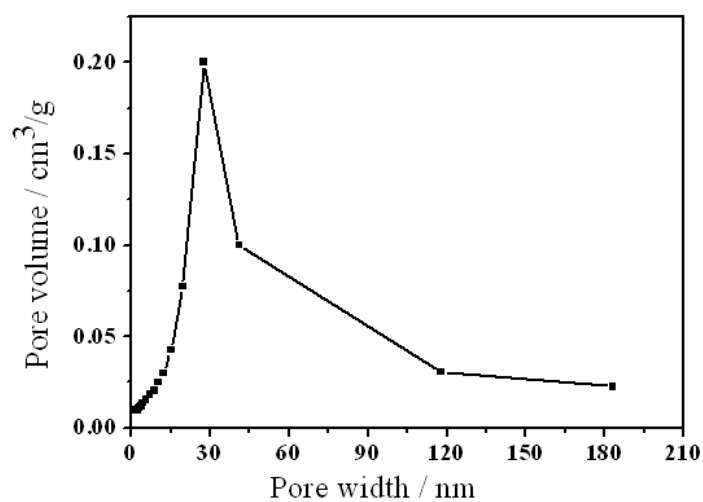

Figure S3. The pore size distribution of NiTiO<sub>3</sub> nanorod calcined at 600 °C for 2 hours

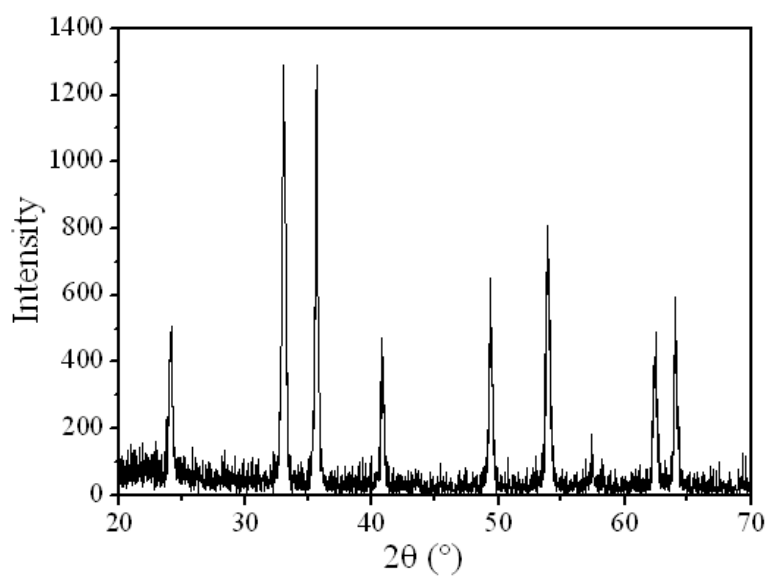

Figure S4. The powder X-ray diffraction (XRD) pattern of NiTiO<sub>3</sub> nanoparticle obtained by *sol-gel* method.

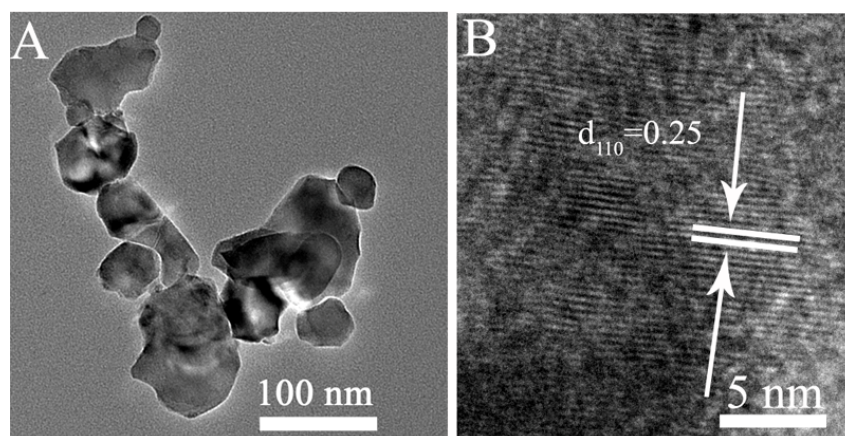

Figure S5. TEM and HRTEM images of NiTiO<sub>3</sub> nanoparticle obtained by *sol-gel* method.

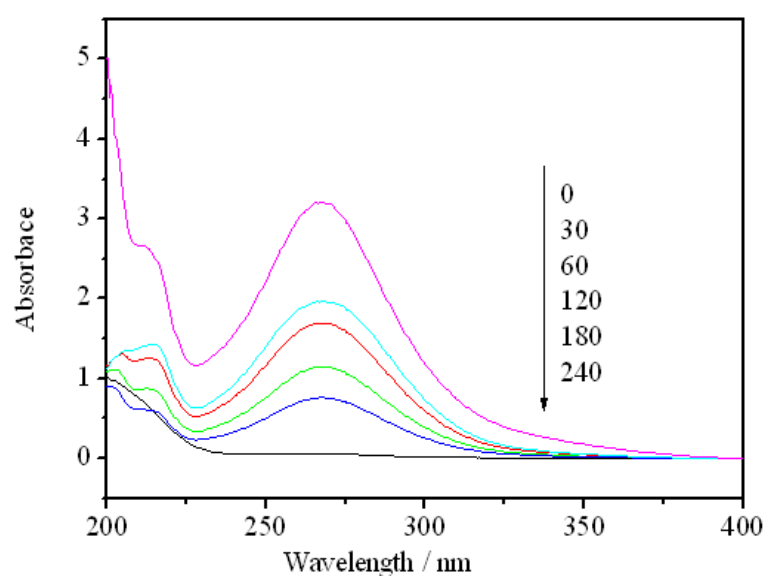

Figure S6. UV spectra of aqueous solutions of nitrobenzene after photocatalysis of NiTiO<sub>3</sub> nanorod for different times.

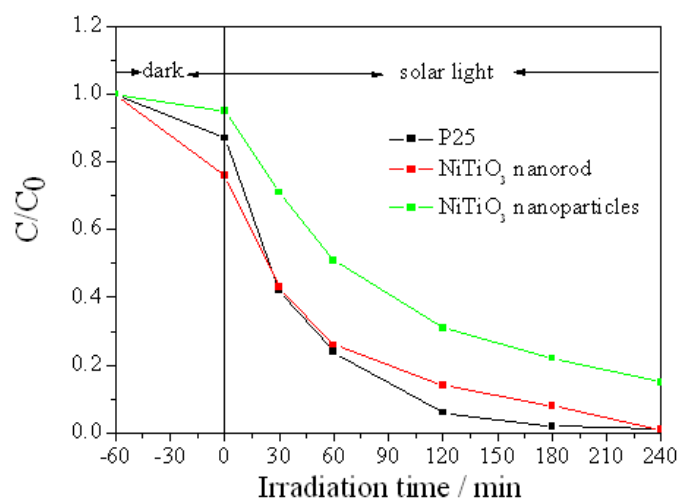

Figure S7. The adsorption and photocatalytic degradation of NB by NiTiO<sub>3</sub> nanorods, NiTiO<sub>3</sub> nanoparticles and P25 with the same weight under solar irradiation.

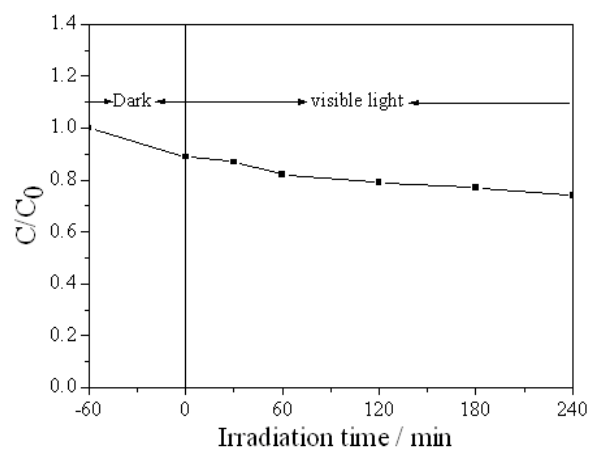

Figure S8. The adsorption and photocatalytic degradation of P25 with the same weight under visible-light irradiation.
